# Supplementary material for: ArhGEF37 assists dynamin 2 during clathrin-mediated endocytosis
Source: PubMed Central journal article supplement (PMC6526708; doi:10.1242/jcs.226530), 2019-05-08
Supplement: joces-132-226530-s1.pdf [file joces-132-226530-s1.pdf]

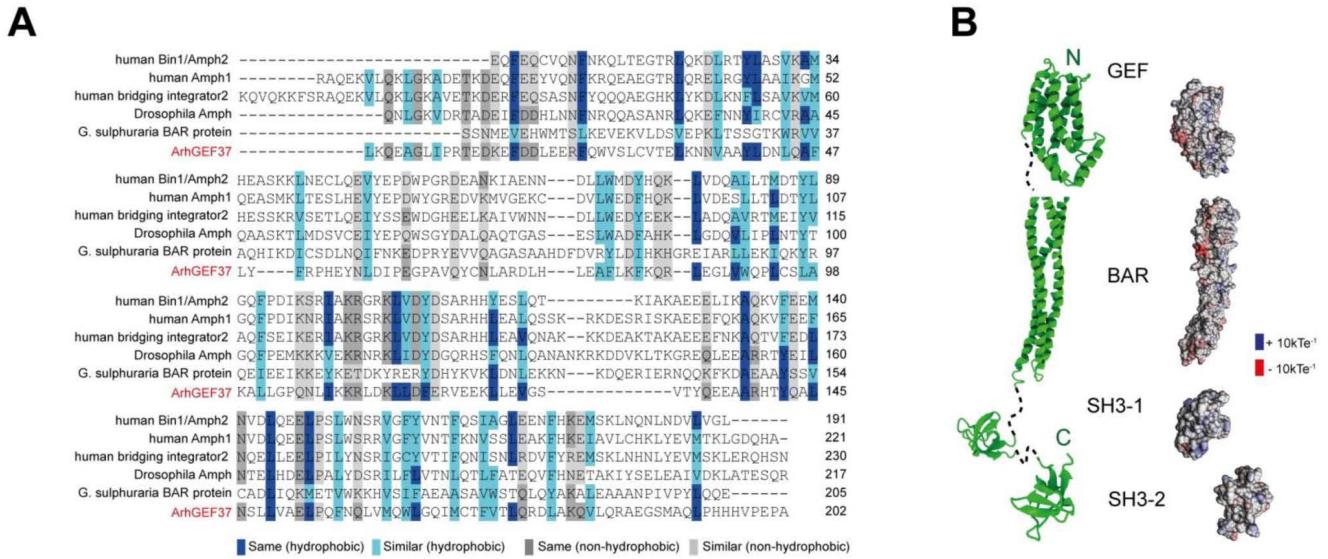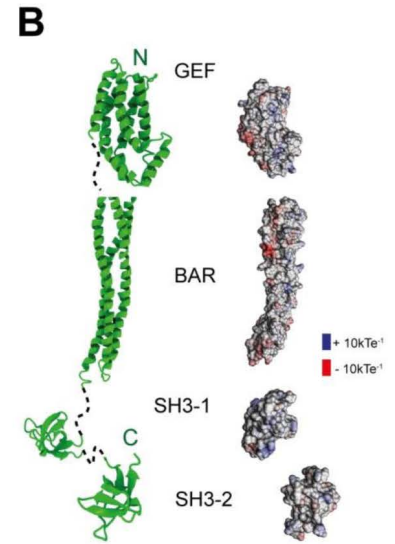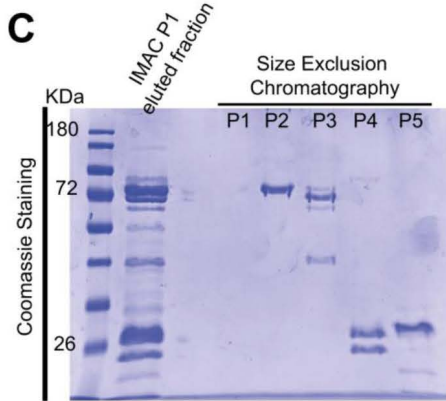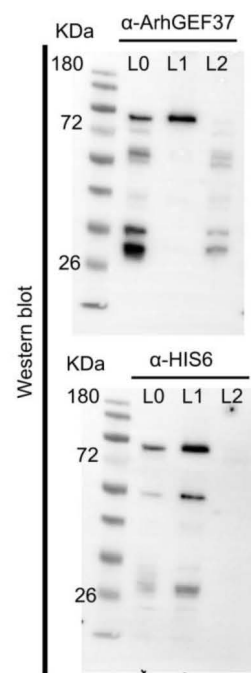

L0: IMAC Input  
 L1: IMAC P1 eluted fraction  
 L2: Waste flow through

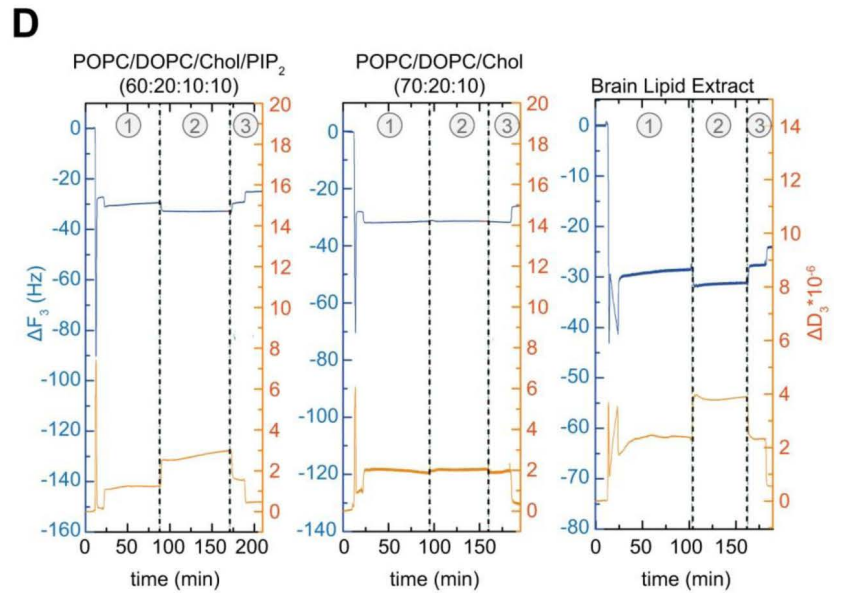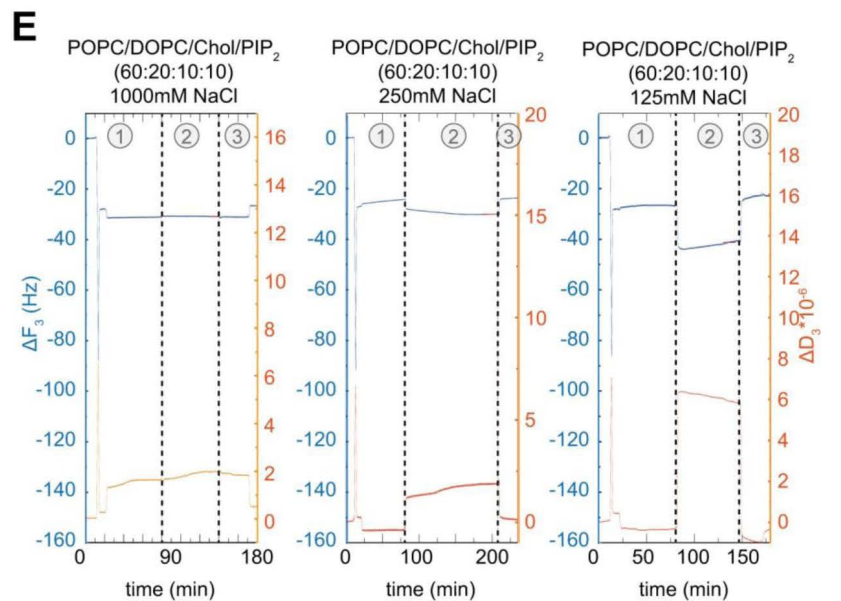

**Fig. S1. ArhGEF37 structure and membrane binding analysis.**

(A) Sequence alignment of BAR domains from ArhGEF37 and different homologs (indicated). Colour-code indicates conserved hydrophobic (blue) and non-hydrophobic (grey) residues. (B) Modelled domains of individual ArhGEF37 domains. Corresponding structure models depicting electrostatic surface potential (red,  $-10\text{kTe}^{-1}$ , blue,  $+10\text{kTe}^{-1}$ ) are shown next to it. (C) Complete Coomassie and Western blots (corresponding to **Fig. 1E**). (D) From left to right, measurements of ArhGEF37 binding to POPS/DOPC/Chol/PI(4,5)P<sub>2</sub>, POPC/DOPC/Chol and Brain lipid extract (corresponding to **Fig. 1E**). (E) From left to right, measurements of ArhGEF37 binding to POPS/DOPC/Chol/PI(4,5)P<sub>2</sub> at 1000 mM, 250 mM and 125 mM, respectively (corresponding to **Fig. 1E**).

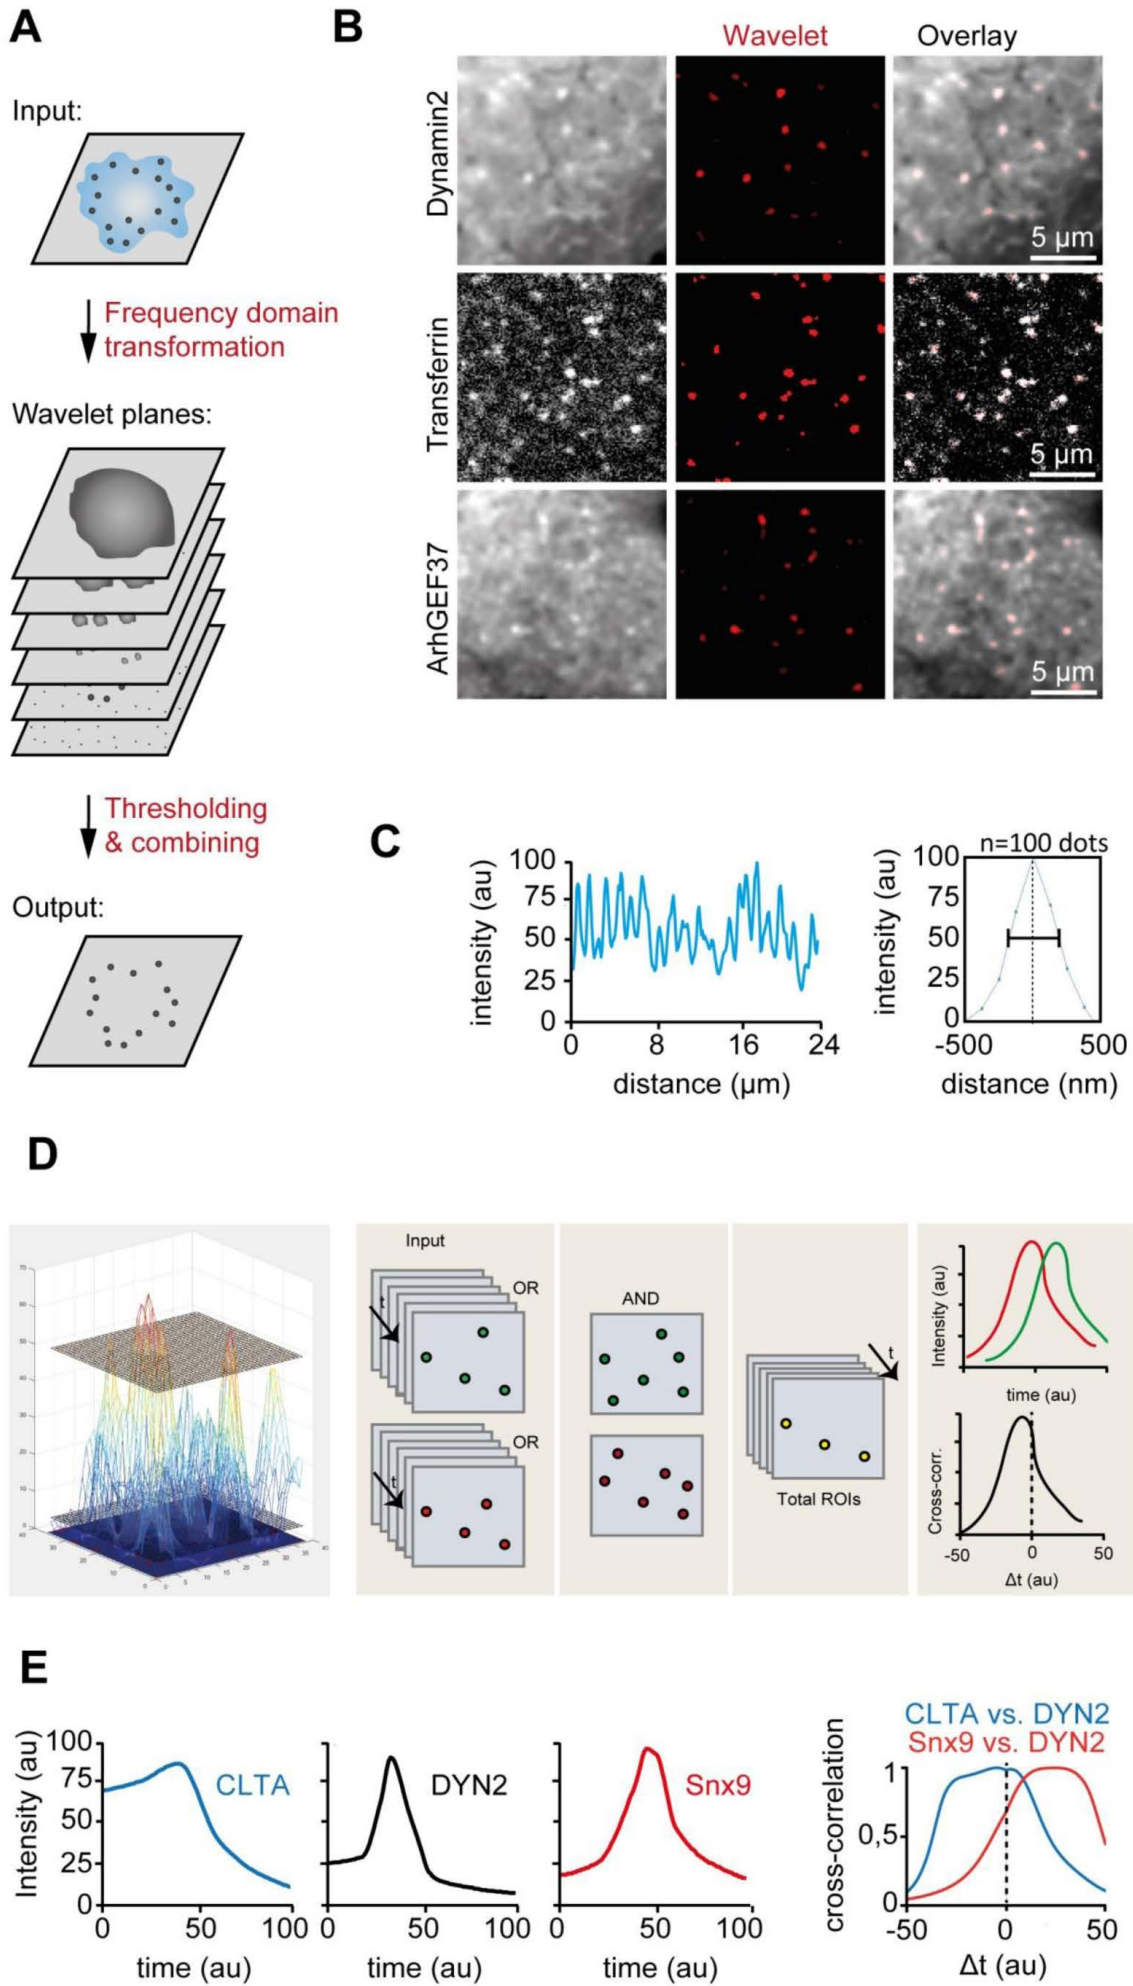

**Fig. S2. Image analysis tools to study ArhGEF37 function. (A)** Scheme

depicting the principle of *à trous* wavelet filtering. In brief, the filter divides the input image into wavelet planes based on different frequencies of signals in the image. The 1<sup>st</sup> order wavelet plane consists of noise (highest frequency), followed by wavelet planes with decreasing frequencies associated with increasing structure size in the spatial domain. By combining the 2<sup>nd</sup> and 3<sup>rd</sup> wavelet planes, followed by a subsequently thresholding, the final output image is generated. **(B)** Quality controls for *à trous* wavelet filtering analysis. To the left, raw images of cells transfected with fluorescently labelled Dynamin2 (DYN2), transferrin and ArhGEF37, respectively. In the middle, result of *à trous* wavelet filtering for respective images (red). To the right, overlay of raw data (grey) and filter results (red). **(C)** Line-scan (left) and overlay of 100 individual puncta (right) suggest diffraction-limited ArhGEF37 aggregates. **(D)** Scheme showing workflow of custom made script for temporal cross-correlation analysis. In brief, individual puncta were isolated, and intensity profiles measured along the z-axis (i.e. time). To determine the temporal order of appearance, intensity profiles within individual puncta (green and red) are then cross-correlated. **(E)** *In silico* testing of temporal cross-correlation analysis. Published data on recruitment kinetics of CTLA, DYN2 and Snx9 was used to generate intensity traces. Note that the software accurately predicts that CTLA precedes DYN2 (blue) while Snx9 follows DYN2 (red). Scale bar, (B) 5  $\mu$ m.

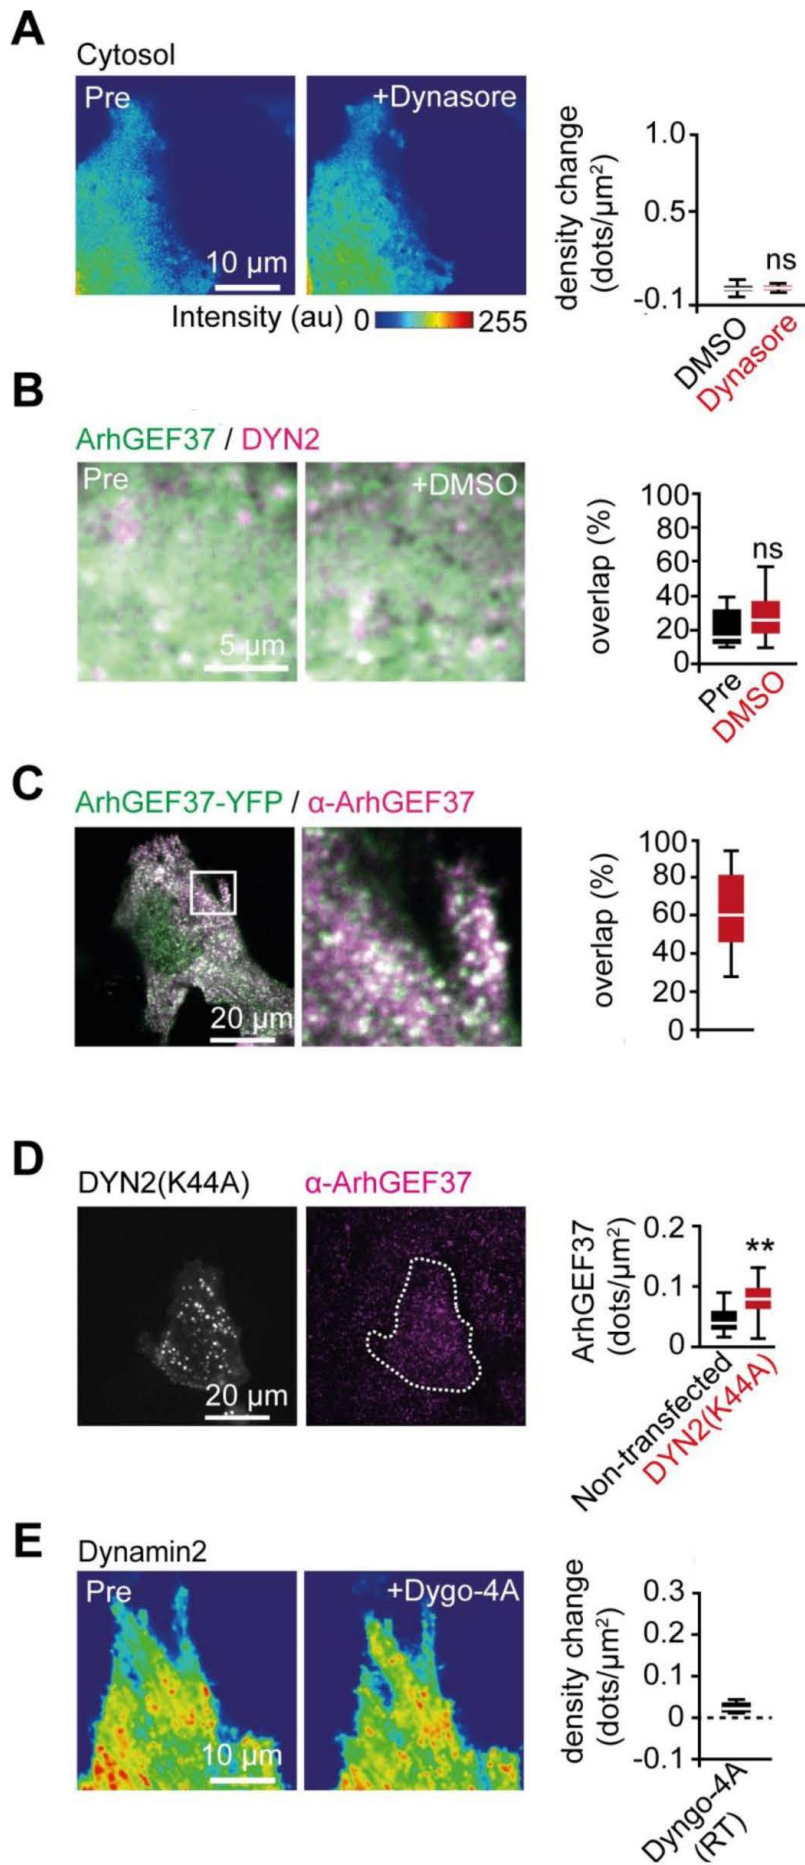

**Fig. S3. Perturbation controls for ArhGEF37 recruitment.** (A) No pattern formation in cytosol after Dynasore addition. To the left, cell expressing cytosolic CFP before (pre) and after (post) exposure to Dynasore. To the right, analysis for change in dots/ $\mu\text{m}^2$  upon addition of DMSO ( $0.00 \pm 0.03$  dots/ $\mu\text{m}^2$ , black,  $n = 12$  cells, mean  $\pm$  SD) and Dynasore ( $0.00 \pm 0.01$  dots/ $\mu\text{m}^2$ , red,  $n = 13$  cells, mean  $\pm$  SD). (B) DMSO does not trigger increased co-localization of DYN2 and ArhGEF37. Cells were transfected with ArhGEF37 (green) and DYN2 (magenta). Note no significant change in total overlap percentage upon DMSO addition (pre:  $21 \pm 10\%$ , black; post:  $27 \pm 13\%$ , red;  $n = 11$  cells, mean  $\pm$  SD). (C) Specificity test for ArhGEF37 antibody. Cells were transfected with ArhGEF37 for 24 hours, fixed and stained with antibody directed against ArhGEF37. Following wavelet-transformation, overlap percentage was determined ( $62 \pm 19\%$ ,  $n = 19$ ). Note: since antibody directed against ArhGEF37 yields multiple bands of various molecular weights on Western blot (**Supplemental Fig. 4G**), unspecific binding partners need to be considered. (D) Expression of dominant-negative DYN2(K44A) yields an increase in ArhGEF37 antibody signal. Cells transfected with DYN2(K44A) for 24 hours were fixed and stained with antibody directed against ArhGEF37. Following wavelet-transformation, puncta density was determined for transfected ( $0.08 \pm 0.02$  dots/ $\mu\text{m}^2$ ;  $n = 35$  cells) and non-transfected ( $0.04 \pm 0.02$  dots/ $\mu\text{m}^2$ ,  $n = 18$  cells) cells. (E) Temperature shift changes Dyngo4A-dependent DYN2 recruitment. Cells were transfected with DYN2 for 24 hours and incubated for 30 minutes with Dyngo-4A at room temperature. Note differences in enrichment of DYN2 to the membrane compared to  $37^\circ\text{C}$  (shown in **Fig. 3A**). Scale bars, (A, E)  $10\ \mu\text{m}$ ; (B)  $5\ \mu\text{m}$ ; (C, D)  $20\ \mu\text{m}$ .

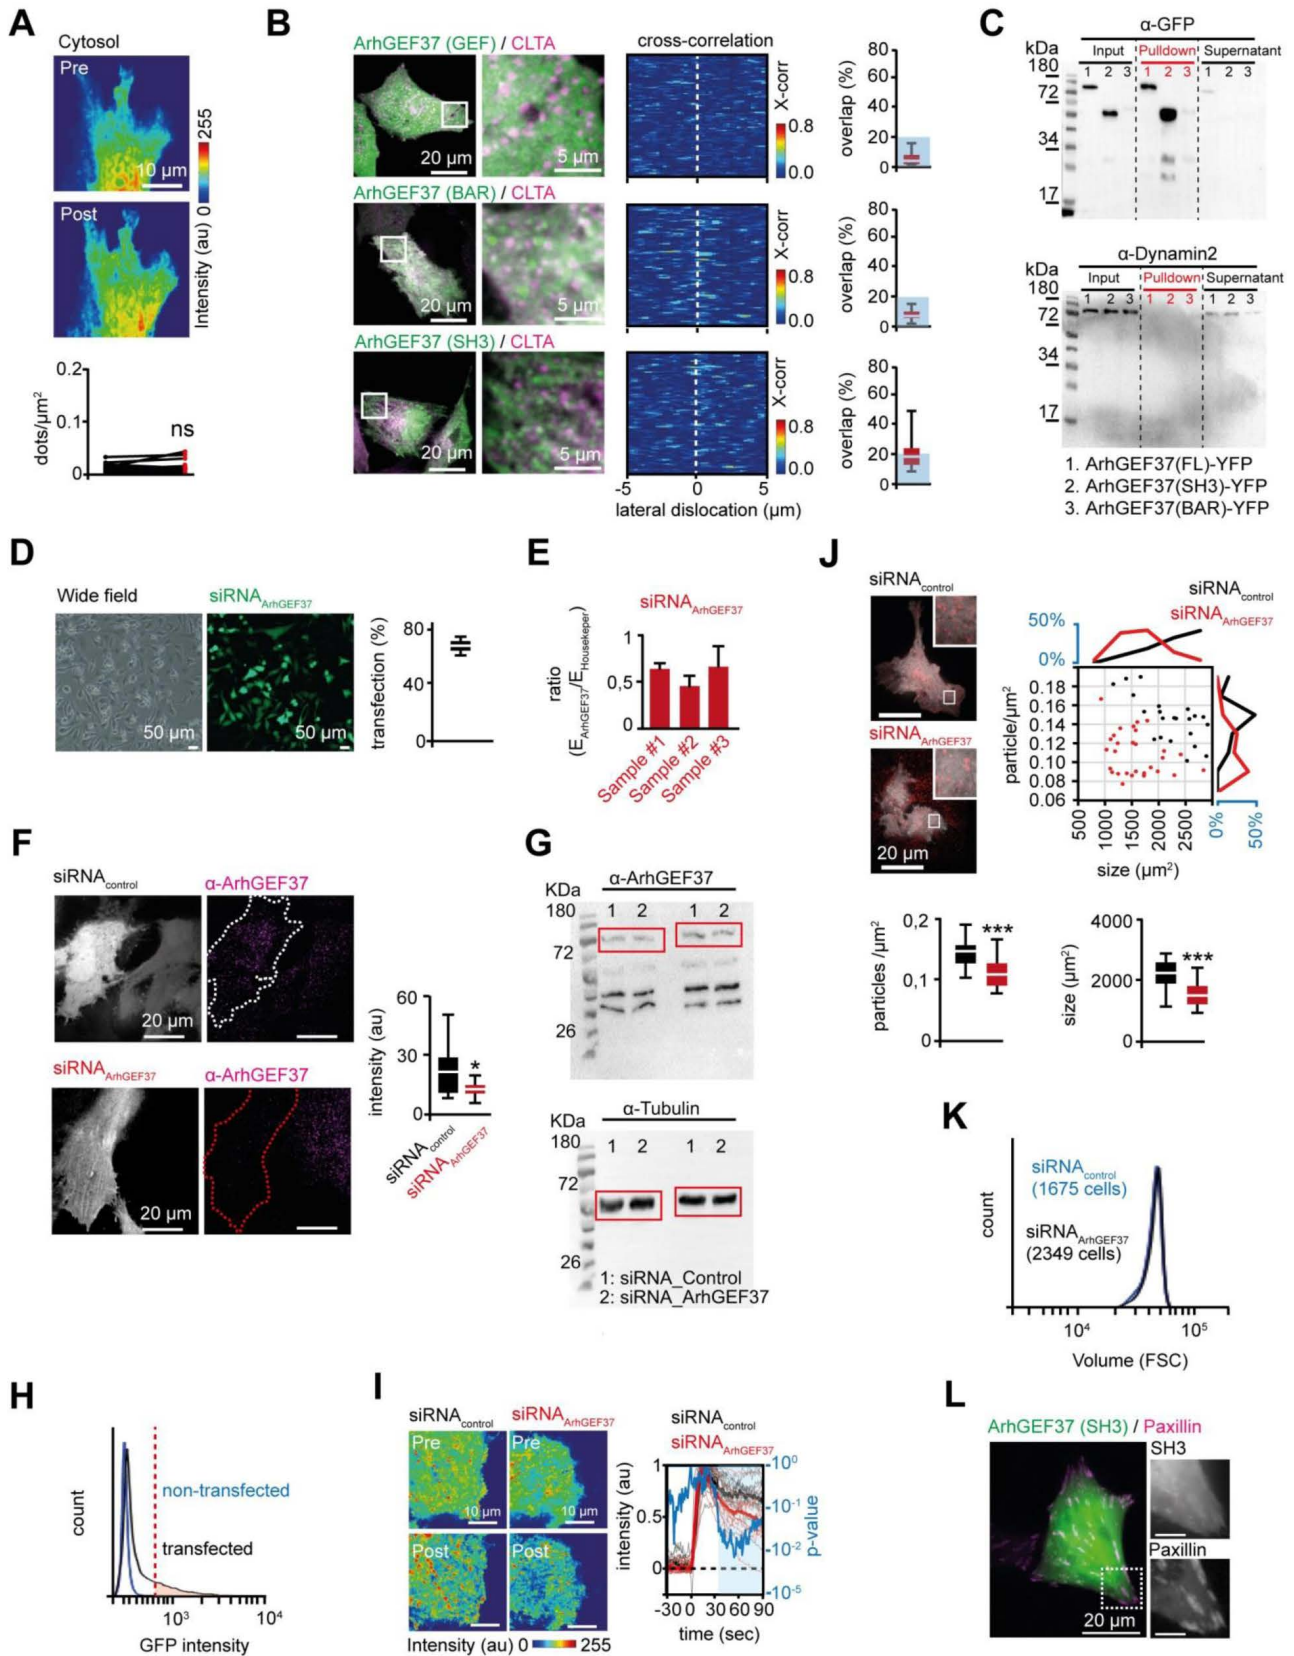

**Fig. S4. Localization controls and ArhGEF37 knockdown validation.**

**(A)** Hyperosmotic shock does not change cytosolic signal. Cells expressing cytosolic CFP before (pre) and after (post) hyperosmotic shock. Below, quantification of particles (dots/ $\mu\text{m}^2$ ) is shown ( $n = 11$  cells). **(B)** Co-localization for different ArhGEF37 domains and CLTA. Left, cells co-expressing indicated ArhGEF37 constructs (green) and CLTA (magenta). Middle panel depict spatial cross-correlation analysis of truncated versions of ArhGEF37 vs. CLTA. To the right, overlap percentage for CTLA and the GEF ( $5 \pm 4\%$ ,  $n = 21$  cells), BAR ( $7 \pm 3\%$ ,  $n = 16$  cells) and SH3 ( $20 \pm 9\%$ ,  $n = 18$  cells) domains (Mean  $\pm$  SD). Blue boxes in the graphs are added as guidance to the eye. **(C)** Pulldown assay yields no apparent interaction between ArhGEF37 and Dynamin2. From left to right, cell lysate (left), pulldown (middle) and supernatant (right) of cells transfected with full length ArhGEF37 (lane 1), the isolated SH3 domain of ArhGEF37 (lane 2), and the isolated BAR domain of ArhGEF37 (lane 3). Upon pulldown, samples were loaded on gel and stained with antibodies directed against GFP (top gel) and Dynamin2 (bottom gel), respectively. **(D)** Representative image of cells co-transfected with siRNA directed against ArhGEF37 (siRNA<sub>ArhGEF37</sub>) and fluorescence marker (green). Graph depicts transfection efficiency ( $65 \pm 3\%$   $n = 4$  technical repeats, mean  $\pm$  SD). **(E)** Analysis of ArhGEF37 knockdown efficiency via qPCR. 48 hours post transfection, cells transfected with siRNA<sub>ArhGEF37</sub> yield  $31 \pm 9\%$  (S1),  $53 \pm 23\%$  (S2) and  $26 \pm 40\%$  (S3) reduction in mRNA levels (3 biological repeats, each with  $n = 3$  technical repeats, median  $\pm$  SD). Note that transfection efficiency of  $65 \pm 3\%$  needs to be considered. **(F)** Knockdown of ArhGEF37 yields reduced ArhGEF37 immunofluorescence signal. To the left cells transfected with siRNA<sub>control</sub> (black, top) or siRNA<sub>ArhGEF37</sub> (red, bottom) are shown. Difference in immunofluorescence in control ( $21 \pm 11$  au, black,  $n = 17$



cells) and ArhGEF37 knockdown ( $12 \pm 3$  au, red,  $n = 19$  cells) are shown to the right. (Mean  $\pm$  SD; Mann Whitney test; \*  $p \leq 0.05$ ). (G) Western blot analysis of ArhGEF37 knockdown efficiency. Cells were transfected for 48 hours with siRNA<sub>control</sub> or siRNA<sub>ArhGEF37</sub>. Upon isolation, protein samples were loaded and stained with antibody directed against ArhGEF37 (top) and tubulin (bottom). Two separate biological repeats yield signal reduction of 38% (left) and 22% (right), respectively. Again, note that transfection efficiency of  $65 \pm 3\%$  needs to be considered. (H) FACS analysis (10'000 cells/condition) depicting signal separation for GFP-transfected cells (black) vs. non-transfected cells (blue). Threshold used in **Fig. 4G** for gating (dashed red line) was set at an arbitrary grey value of 670, yielding <1% false positives. (I) ArhGEF37 retains DYN2 at endocytotic sites. Cells co-transfected with siRNA<sub>control</sub> (black) or siRNA<sub>ArhGEF37</sub> (red) and fluorescently tagged DYN2 before (top) and after (bottom) hyperosmotic shock. To the right, kinetics and statistical analysis (blue) are shown. As above, bold lines depict the median, thin lines individual experiments ( $n = 14$  cells for siRNA<sub>control</sub> and siRNA<sub>ArhGEF37</sub>, respectively). (J) Knockdown of ArhGEF37 reduces transferrin uptake and area of adherent cells. Cells transfected with fluorescence marker and control siRNA or siRNA directed against ArhGEF37 after incubation with transferrin-Alexa647 for 10 minutes at 37 °C. To the right, scatter plot depicting cell area vs. transferrin uptake for siRNA<sub>control</sub> (black,  $n = 22$  cells) and siRNA<sub>ArhGEF37</sub> (red, cells,  $n = 29$  cells), respectively. Below, quantification of transferrin uptake for siRNA<sub>control</sub> ( $0.14 \pm 0.02$  particles/ $\mu\text{m}^2$ , black) and siRNA<sub>ArhGEF37</sub> ( $0.10 \pm 0.02$  particles/ $\mu\text{m}^2$ , red), respectively, show a slight but significant reduction in transferrin uptake. Likewise, quantification of cell area upon transfection with siRNA<sub>control</sub> ( $2216 \pm 490$   $\mu\text{m}^2$ , black) and siRNA<sub>ArhGEF37</sub> ( $1585 \pm 446$   $\mu\text{m}^2$ , red) show a

significant difference in cell area. **(K)** Knockdown of ArhGEF37 does not change cell volume in FACS analysis. Cells co-transfected with fluorescence marker and siRNA<sub>control</sub> (blue) or siRNA<sub>ArhGEF37</sub> (black). Forward scatter does not yield apparent changes in cell volume. **(L)** The SH3 domain of ArhGEF37 localizes to paxillin-positive focal adhesions. Cells were co-transfected with the isolated SH3 domain of ArhGEF37 (green) and the focal adhesion protein paxillin (magenta). Note slight enrichment of the SH3 domain of ArhGEF37 at focal adhesions. Statistics: \*  $p \leq 0.05$ , \*\*  $p \leq 0.01$ , \*\*\*  $p \leq 0.001$ ; Mann Whitney test; Error bars represent SEM. Scale bars, (A, I) 10  $\mu\text{m}$ ; (B, L) 20  $\mu\text{m}$ , 5  $\mu\text{m}$ ; (D) 50  $\mu\text{m}$ ; (F) 20  $\mu\text{m}$ .

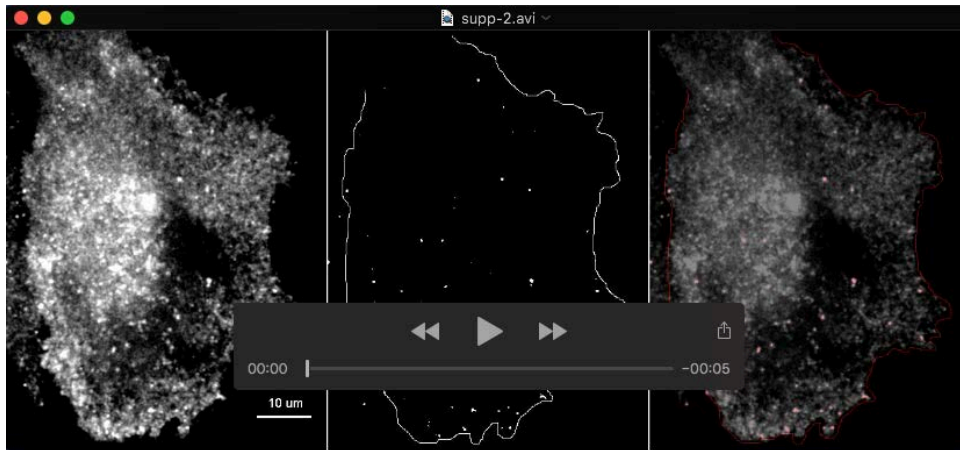

**Movie 1. ArhGEF37 recruitment analysed via *à trous* wavelet filtering.**

HeLa cell transfected with ArhGEF37. To the left, raw data of basal PM. In the middle, same movie subjected to *à trous* filtering. To the right, overlay of raw (grey) and filtered (red) data. Frames captured at 1 Hz. Scale bar, 10  $\mu\text{m}$ .

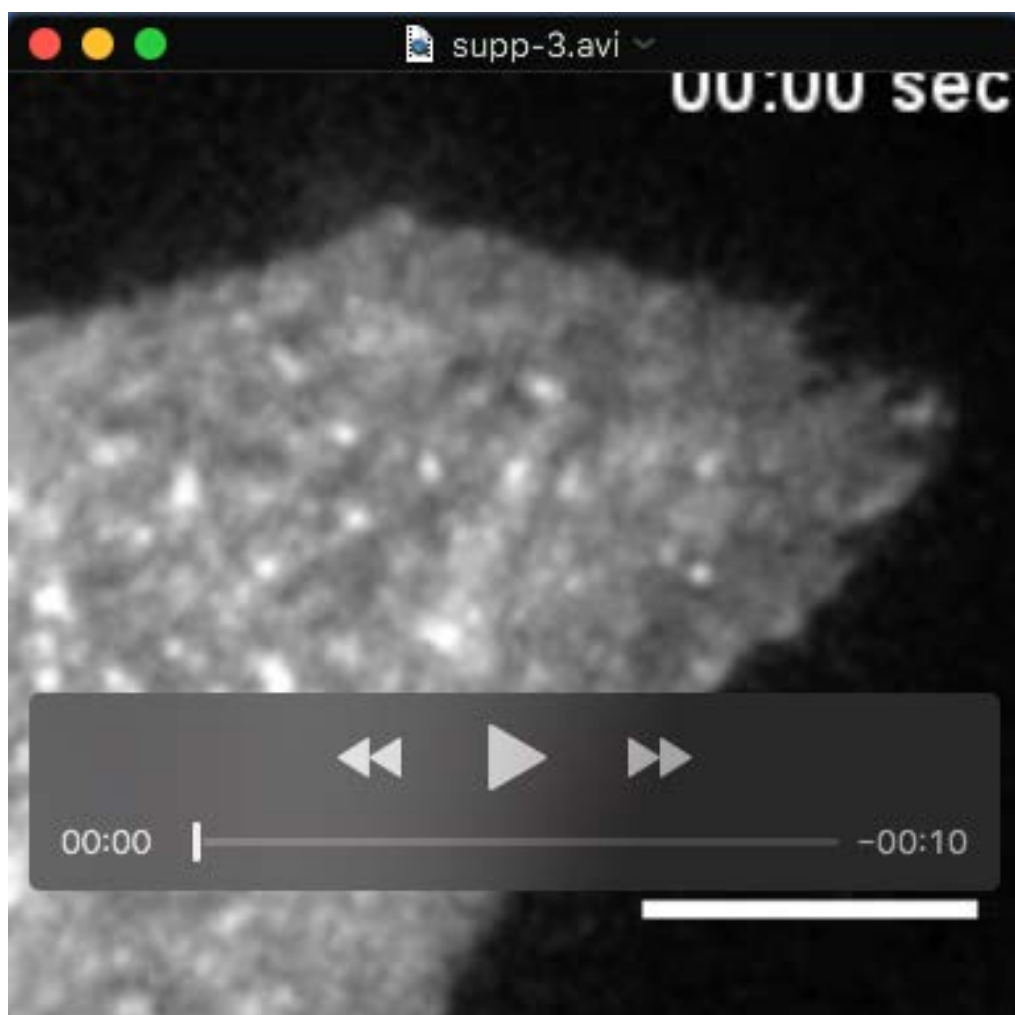

**Movie 2. DYN2 recruitment to the PM increases upon hyperosmotic shock.** HeLa cell transfected with DYN2 and subjected to hyperosmotic shock (star). Individual frames captured at 1 Hz. Scale bar, 10  $\mu$ m.

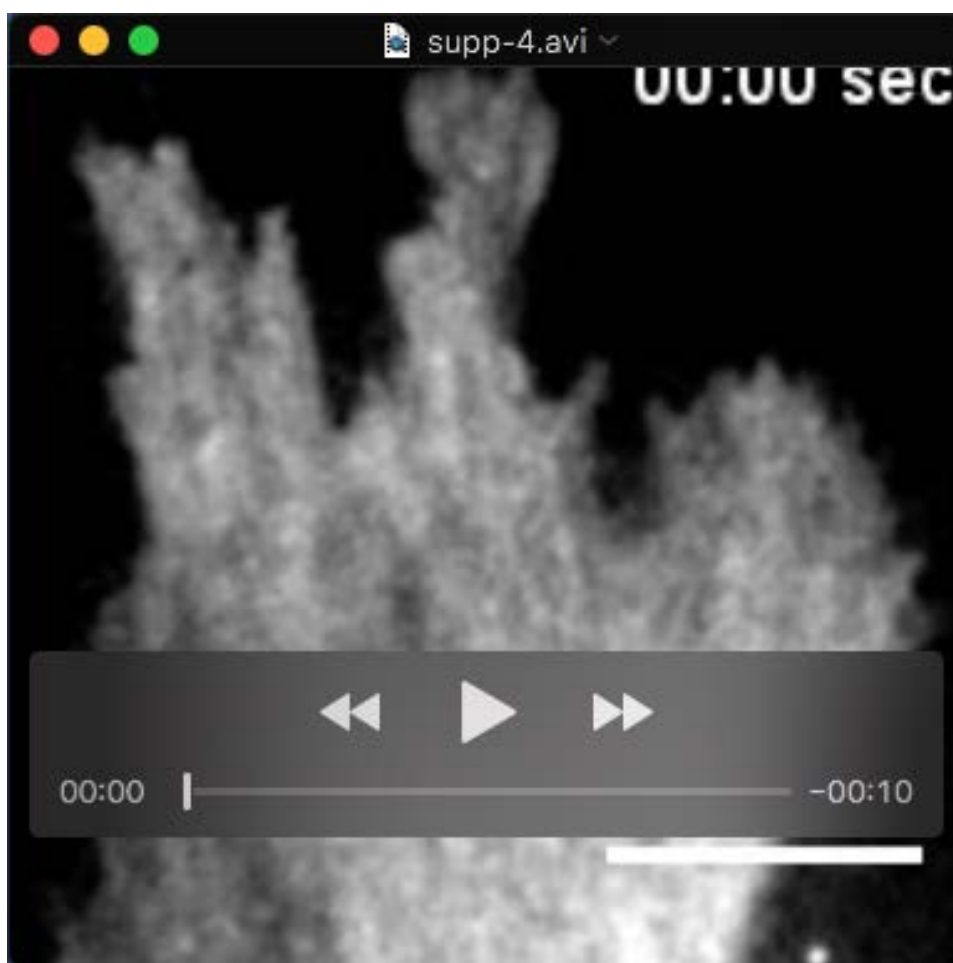

**Movie 3. ArhGEF37 recruitment to the PM increases upon hyperosmotic shock.** HeLa cell transfected with ArhGEF37, followed by hyperosmotic shock (star). Frames were taken at 1 Hz. Scale bar, 10  $\mu$ m.

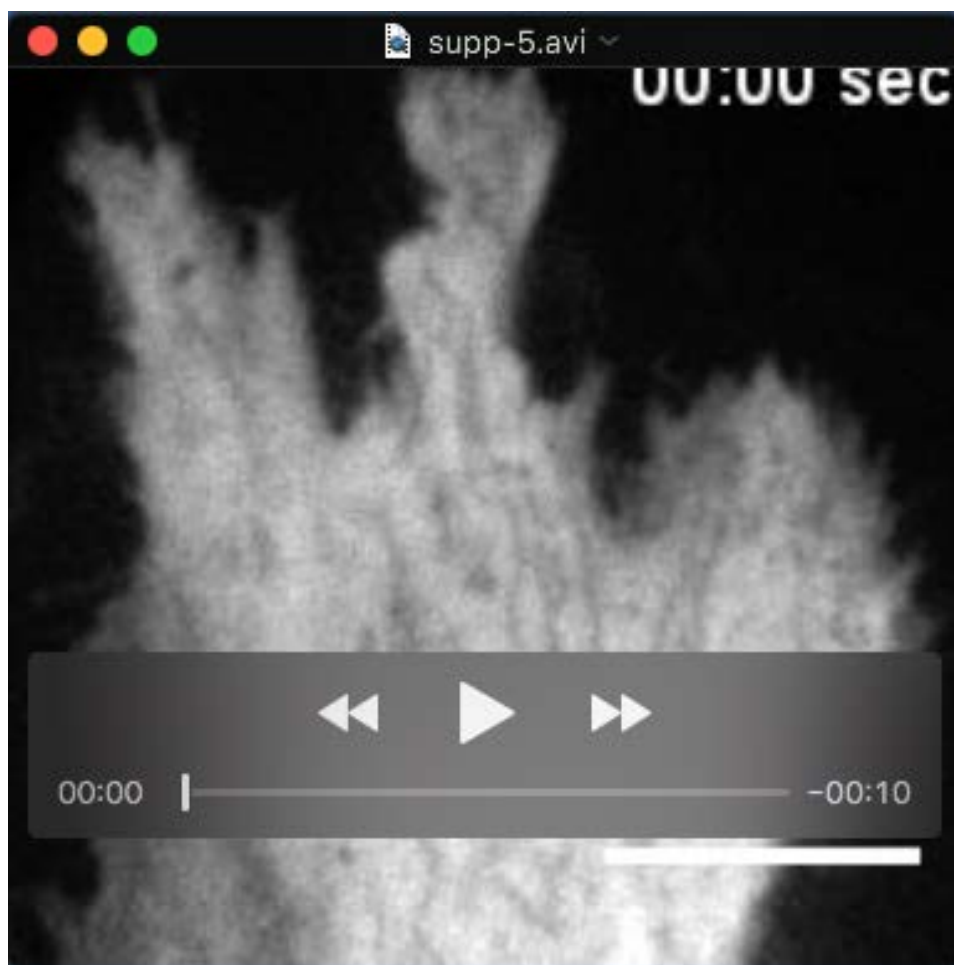

**Movie 4. No change in cytosolic perturbation after hyperosmotic shock.**

HeLa cell transfected with cytosolic marker and subjected to hyperosmotic shock (star). Individual frames were taken at 1 Hz. Scale bar, 10  $\mu\text{m}$ .

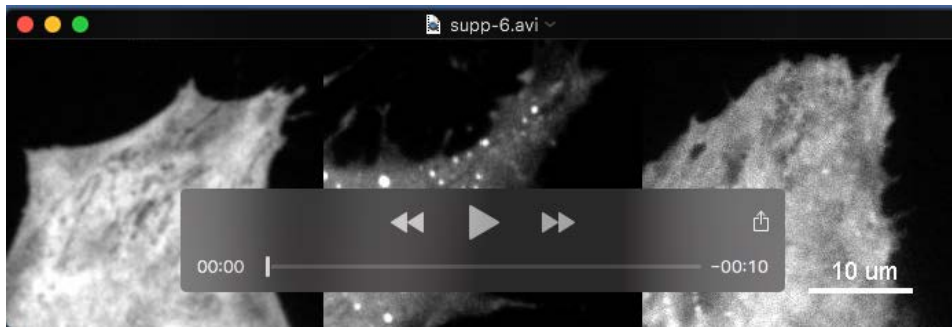

**Movie 5. PM recruitment of BAR and SH3 domain of ArhGEF37 increase after hyper-osmotic shock.** HeLa cells transfected with truncated versions of ArhGEF37 (GEF; BAR, SH3), and subjected to hyperosmotic shock (star). Individual frames were taken at 1 Hz. Scale bar, 10  $\mu\text{m}$ .

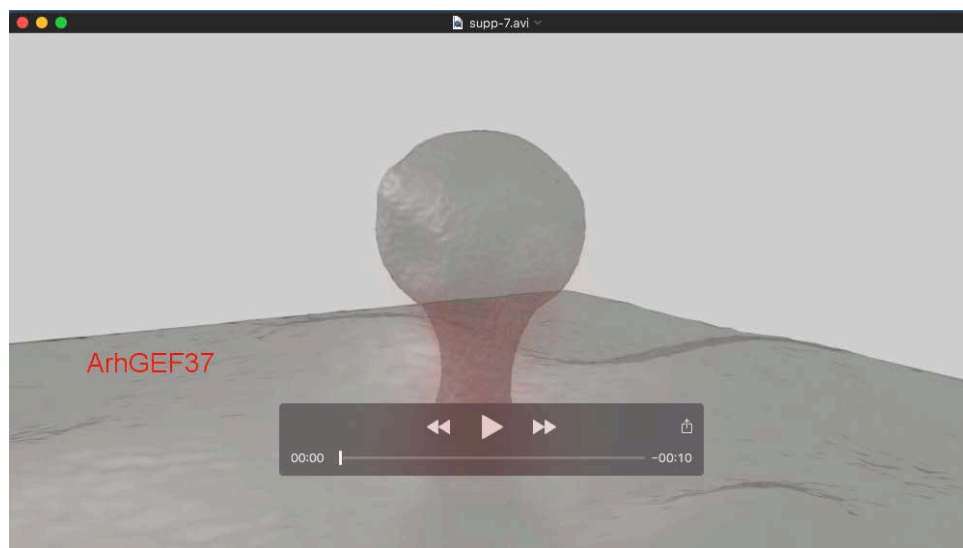

**Movie 6. 3D model depicting potential sites for ArhGEF37 enrichment during late phase of CME.** Clathrin (blue), filamentous actin (green), Dynamin (yellow), and ArhGEF37 (red) are shown.

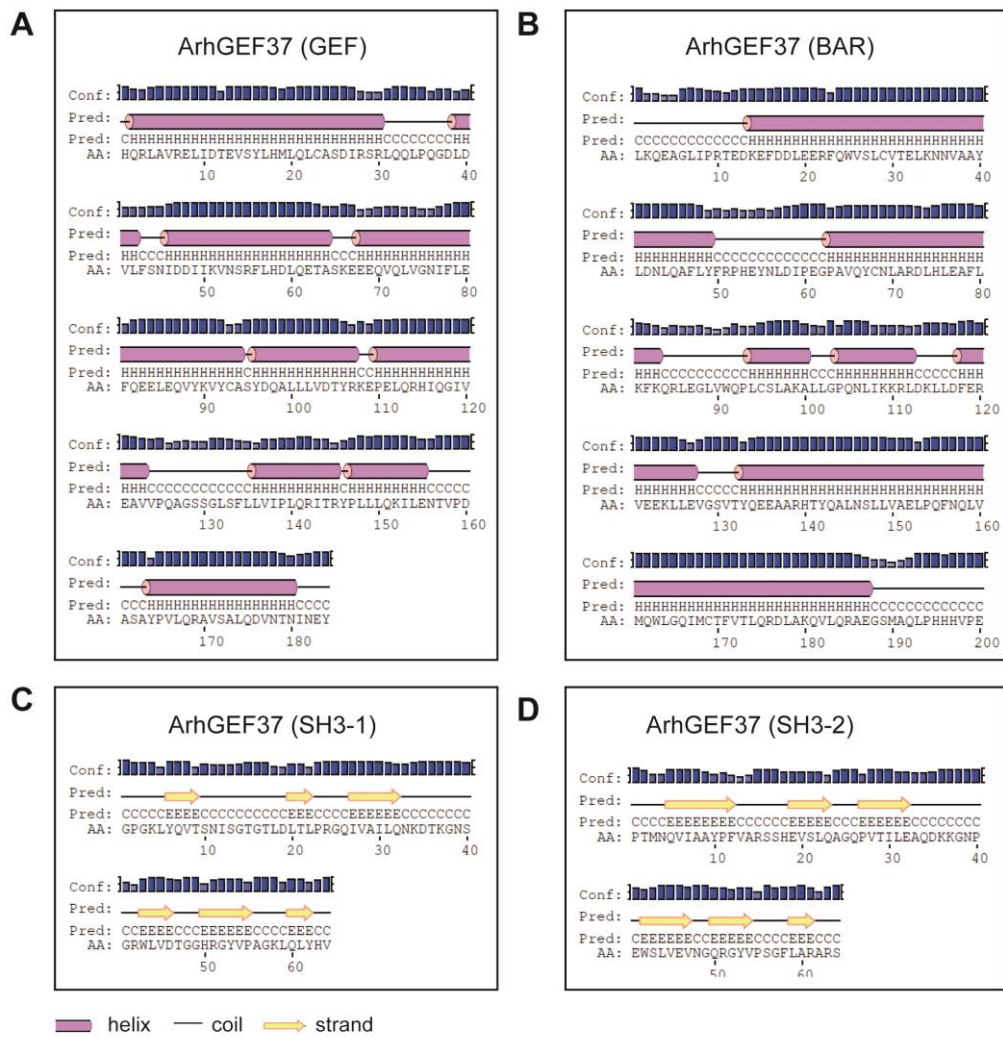

**Table S1. Protein secondary structure prediction.** Graphical representation of secondary structures predicted via PSIPRED for the following ArhGEF37 domains: GEF domain (A), BAR domain (B) and the two SH3 domains (C and D). For every amino acid, blue bars indicate confidence of the prediction. Black lines (letter code C), yellow arrows (letter code E) or purple cylinders (letter code H) indicate a predicted coil region,  $\beta$ -strand or  $\alpha$ -helix, respectively.



| Domain | PDB ID | Homologs                                                                                         |
|--------|--------|--------------------------------------------------------------------------------------------------|
| GEF    | 3EO2   | RhoGEF domain of h-neuroepithelial cell transforming gene-1                                      |
|        | 3GF9   | Crystal structure of Human intersectin 2 RhoGEF domain                                           |
|        | 1F5X   | NMR structure of the Y174 autoinhibited DBL homology domain                                      |
| BAR    | 4AVM   | Crystal structure of N-BAR domain of h-bridging integrator 2                                     |
|        | 2FIC   | Crystal structure of BAR domain from human Bin1/Amphiphysin II                                   |
|        | 1URU   | Amphiphysin BAR domain from <i>Drosophila</i>                                                    |
|        | 4ATM   | Crystal structure of BAR domain of human Amphiphysin, isoform 1                                  |
|        | 3CAZ   | Crystal structure of a BAR protein from <i>Galdieria sulphuraria</i>                             |
| SH3-1  | 1UHC   | Solution structure of RSG1 RUH-002, SH3 domain of human DNMBP/ K1AA1010 protein                  |
|        | 1UG1   | SH3 domain of hypothetical protein BAA76854.1                                                    |
|        | 1SEM   | Structural determinants of peptide-binding orientation & of sequence specificity in SH3 domains. |
| SH3-2  | 1UHC   | Solution structure of RSG1 RUH-002, SH3 domain of human DNMBP/ K1AA1010 protein                  |
|        | 2KBT   | Attachment of an NMR-invisible solubility enhancement tag                                        |
|        | 1OOT   | SH3 domain from a <i>S. cerevisiae</i> hypothetical 40.4 kDa protein                             |
|        | 2K9G   | Solution structure of 3 <sup>rd</sup> SH3 domain of the Cin85 adapter protein                    |

**Table S2. Structures used for homology modeling.** For each domain, both the PDB code and the name of the used homologs are indicated.

| ArhGEF37 (GEF) |           |         |          | ArhGEF37 (BAR) |           |         |          | ArhGEF37 (SH3-1) |           |         |          | ArhGEF37 (SH3-2) |           |         |          |
|----------------|-----------|---------|----------|----------------|-----------|---------|----------|------------------|-----------|---------|----------|------------------|-----------|---------|----------|
| Conf.          | Net Score | P-value | Homology | Conf.          | Net Score | P-value | Homology | Conf.            | Net Score | P-value | Homology | Conf.            | Net Score | P-value | Homology |
| CERT           | 93.853    | 2e-08   | 3eo2     | CERT           | 80.653    | 4e-07   | 4avm     | MEDIUM           | 46.009    | 0.001   | 1ug1     | HIGH             | 54.277    | 2e-04   | 1uhc     |
| CERT           | 91.089    | 3e-08   | 3gf9     | CERT           | 80.423    | 4e-07   | 2fc      | MEDIUM           | 43.404    | 0.002   | 1uhc     | HIGH             | 47.418    | 8e-04   | 2kbt     |
| CERT           | 90.799    | 3e-08   | 2dfk     | CERT           | 77.736    | 7e-07   | 1uru     | MEDIUM           | 43.403    | 0.002   | 1sem     | HIGH             | 46.865    | 9e-04   | 1oot     |
| CERT           | 88.703    | 6e-08   | 1f5x     | CERT           | 77.724    | 7e-07   | 4atm     | MEDIUM           | 42.831    | 0.002   | 1gri     | HIGH             | 46.802    | 1e-03   | 2k9g     |
| CERT           | 84.763    | 1e-07   | 1kz7     | CERT           | 66.051    | 1e-05   | 3caz     | MEDIUM           | 42.625    | 0.003   | 2drm     | MEDIUM           | 46.559    | 0.001   | 2ydl     |
| CERT           | 83.877    | 2e-07   | 1foe     | HIGH           | 54.144    | 2e-04   | 2d4c     | MEDIUM           | 42.326    | 0.003   | 1oot     | MEDIUM           | 46.474    | 0.001   | 1gri     |
| CERT           | 82.708    | 2e-07   | 2pz1     | HIGH           | 51.949    | 3e-04   | 1zww     | MEDIUM           | 41.910    | 0.003   | 2da9     | MEDIUM           | 46.304    | 0.001   | 2dl7     |
| CERT           | 81.786    | 3e-07   | 2vrw     | HIGH           | 50.475    | 4e-04   | 1i4d     | MEDIUM           | 41.396    | 0.003   | 2kbt     | MEDIUM           | 45.693    | 0.001   | 1sem     |
| CERT           | 81.746    | 3e-07   | 1ki1     | HIGH           | 49.456    | 5e-04   | 4akv     | MEDIUM           | 40.912    | 0.004   | 1x2k     | MEDIUM           | 45.324    | 0.001   | 2jte     |
| CERT           | 81.581    | 3e-07   | 3jv3     | MEDIUM         | 45.234    | 0.001   | 2raj     | MEDIUM           | 40.793    | 0.004   | 2rf0     | MEDIUM           | 44.805    | 0.002   | 1zlm     |
| CERT           | 80.679    | 4e-07   | 3p6a     | MEDIUM         | 44.748    | 0.002   | 4nsw     | MEDIUM           | 40.763    | 0.004   | 2k9g     | MEDIUM           | 44.546    | 0.002   | 2yun     |
| CERT           | 80.094    | 4e-07   | 4gyv     | MEDIUM         | 43.403    | 0.002   | 2z0v     | MEDIUM           | 40.645    | 0.004   | 2ydl     | MEDIUM           | 44.508    | 0.002   | 1uti     |
| CERT           | 80.028    | 4e-07   | 2z0q     | MEDIUM         | 41.858    | 0.003   | 3fhn     | MEDIUM           | 40.511    | 0.004   | 2dl4     | MEDIUM           | 44.454    | 0.002   | 1zsg     |
| CERT           | 79.170    | 5e-07   | 2rgn     | MEDIUM         | 39.811    | 0.005   | 2q12     | MEDIUM           | 40.483    | 0.004   | 3ulr     | MEDIUM           | 44.423    | 0.002   | 2g6f     |
| CERT           | 78.270    | 6e-07   | 2kr9     | MEDIUM         | 39.464    | 0.005   | 1u5p     | MEDIUM           | 40.384    | 0.004   | 2jte     | MEDIUM           | 44.353    | 0.002   | 3m0u     |
| CERT           | 78.029    | 7e-07   | 1txd     | MEDIUM         | 39.176    | 0.006   | 3i2w     | MEDIUM           | 40.367    | 0.004   | 3ua7     | MEDIUM           | 44.344    | 0.002   | 2a08     |
| CERT           | 77.788    | 7e-07   | 1xcg     | MEDIUM         | 39.102    | 0.006   | 2q13     | MEDIUM           | 40.354    | 0.004   | 4hvw     | MEDIUM           | 44.335    | 0.002   | 2d8h     |
| CERT           | 75.961    | 1e-06   | 3ky9     | MEDIUM         | 38.658    | 0.006   | 4h8s     | MEDIUM           | 40.312    | 0.004   | 3nmz     | MEDIUM           | 44.229    | 0.002   | 1u5s     |
| CERT           | 75.921    | 1e-06   | 1nty     | MEDIUM         | 38.172    | 0.007   | 3g9g     | MEDIUM           | 40.058    | 0.005   | 2d1x     | MEDIUM           | 44.115    | 0.002   | 1x2k     |
| CERT           | 74.619    | 1e-06   | 4gou     | MEDIUM         | 37.954    | 0.007   | 3pdy     | MEDIUM           | 40.048    | 0.005   | 2vwf     | MEDIUM           | 44.077    | 0.002   | 3ua7     |
| CERT           | 73.090    | 2e-06   | 1by1     | MEDIUM         | 37.818    | 0.008   | 2j69     | MEDIUM           | 39.937    | 0.005   | 2yun     | MEDIUM           | 44.002    | 0.002   | 4ag1     |
| CERT           | 72.855    | 2e-06   | 4gzu     | MEDIUM         | 37.668    | 0.008   | 2v0o     | MEDIUM           | 39.892    | 0.005   | 3zl7     | MEDIUM           | 43.919    | 0.002   | 1neg     |
| CERT           | 58.196    | 7e-05   | 3mpx     | MEDIUM         | 37.373    | 0.009   | 3zkv     | MEDIUM           | 39.883    | 0.005   | 2cre     | MEDIUM           | 43.829    | 0.002   | 3ngp     |
| HIGH           | 53.427    | 2e-04   | 1dbh     | MEDIUM         | 37.007    | 0.009   | 3dyt     | MEDIUM           | 39.797    | 0.005   | 2dl7     | MEDIUM           | 43.745    | 0.002   | 2drm     |
| HIGH           | 51.539    | 3e-04   | 3ksy     | LOW            | 36.647    | 0.010   | 1u4q     | MEDIUM           | 39.630    | 0.005   | 2js2     | MEDIUM           | 43.679    | 0.002   | 1wyx     |
| LOW            | 32.702    | 0.025   | 3i9y     | LOW            | 36.039    | 0.012   | 4jeh     | MEDIUM           | 39.565    | 0.005   | 2a08     | MEDIUM           | 43.667    | 0.002   | 1x69     |
| LOW            | 32.144    | 0.029   | 4m7c     | LOW            | 36.030    | 0.012   | 1hci     | MEDIUM           | 39.490    | 0.005   | 1zsg     | MEDIUM           | 43.578    | 0.002   | 2xmf     |
| LOW            | 31.665    | 0.032   | 3qou     | LOW            | 36.002    | 0.012   | 4fzs     | MEDIUM           | 39.373    | 0.005   | 2ak5     | MEDIUM           | 43.570    | 0.002   | 4afq     |
| LOW            | 31.659    | 0.032   | 3edv     | LOW            | 35.575    | 0.013   | 2r17     | MEDIUM           | 39.343    | 0.005   | 1uti     | MEDIUM           | 43.515    | 0.002   | 3ulr     |
| LOW            | 31.304    | 0.035   | 3pdy     | LOW            | 35.470    | 0.013   | 2fji     | MEDIUM           | 39.313    | 0.005   | 1ng2     | MEDIUM           | 43.475    | 0.002   | 2ak5     |

Conf. : The hit confidence category  
 Net Score: The GenTHREADER raw score

**Table S3. Fold-based homolog search.** A list of homologs found using the fold-based homolog searching server pGenTHREADER. For every individual domain, the 30 top scoring hits are detailed with indications of the level of confidence, the pGenTHREADER Net Score, the p-value and the PDB accession code.

| Gene     | RefSeq access no. | Forward primer (5'-3') | Reverse primer (5'-3') |
|----------|-------------------|------------------------|------------------------|
| ArhGEF37 | NM_001001669      | ATCCTCCAGGTCAGGGAGT    | TGCGGCAACTGCTGGAG      |
|          |                   | TGAACCAGGTCATAGCCGC    | CCAAGAAGCCAGAAGGCACA   |
| OAZ      | NM_004152         | TAACTGGCCAACAGTGCTGA   | ATGAAGACATGGTCGGCTCG   |
| RPS13    | NM_001017         | GCTCTCCTTTCGTTGCCTGA   | TAGGGTAAAGCCGATGGGA    |

**Table S4. List of forward and reverse primers used for qPCR. OAZ**

stands for Ornithine decarboxylase antizyme, and RPS13 for Ribosomal protein S13.
